# Supplementary material for: Post-Harvest Processing Methods Have Critical Roles in the Contents of Active Ingredients of Scutellaria baicalensis Georgi
Source: MDPI journal article supplement (doi:10.3390/molecules27238302), 2022-11-28
Supplement: s1 [file s1]

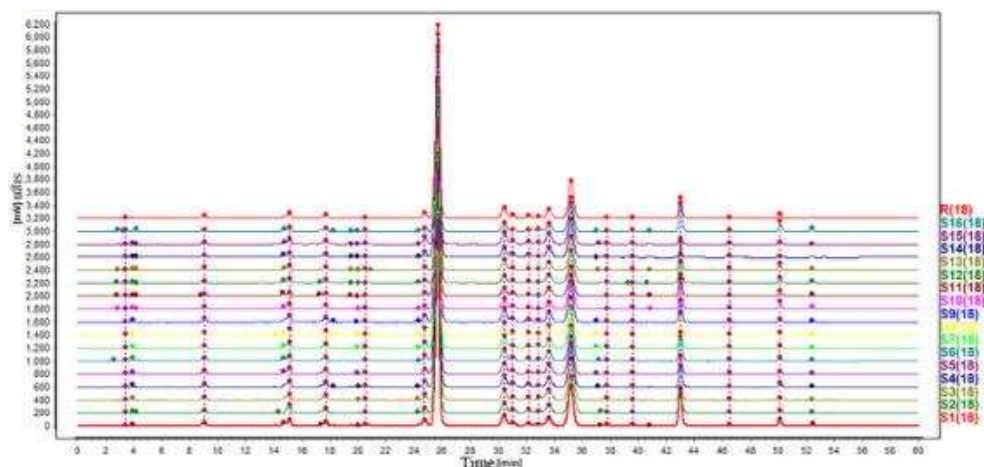

**Figure S1.** Fingerprints of *S.baicalensis* in 16 batches of different processing processes

**Table S1.** The relative retention time of the common peaks of the 16 batches of *S. baicalensis* with different processing

| NO. | The Relative Retention Time |       |       |       |       |       |       |       |       |       |       |       |       |       |       |       | RSD/  |
|-----|-----------------------------|-------|-------|-------|-------|-------|-------|-------|-------|-------|-------|-------|-------|-------|-------|-------|-------|
|     | S1                          | S2    | S3    | S4    | S5    | S6    | S7    | S8    | S9    | S10   | S11   | S12   | S13   | S14   | S15   | S16   | %     |
| 1   | 0.096                       | 0.098 | 0.096 | 0.096 | 0.098 | 0.098 | 0.097 | 0.097 | 0.097 | 0.096 | 0.097 | 0.096 | 0.097 | 0.098 | 0.096 | 0.098 | 0.744 |
| 2   | 0.258                       | 0.262 | 0.257 | 0.264 | 0.260 | 0.265 | 0.260 | 0.260 | 0.261 | 0.258 | 0.260 | 0.259 | 0.260 | 0.249 | 0.258 | 0.262 | 1.352 |
| 3   | 0.431                       | 0.436 | 0.428 | 0.441 | 0.433 | 0.442 | 0.433 | 0.433 | 0.435 | 0.431 | 0.430 | 0.431 | 0.432 | 0.429 | 0.431 | 0.435 | 0.891 |
| 4   | 0.504                       | 0.510 | 0.500 | 0.514 | 0.506 | 0.516 | 0.506 | 0.506 | 0.508 | 0.505 | 0.504 | 0.504 | 0.506 | 0.506 | 0.505 | 0.508 | 0.788 |
| 5   | 0.583                       | 0.591 | 0.577 | 0.577 | 0.586 | 0.598 | 0.586 | 0.587 | 0.582 | 0.583 | 0.583 | 0.582 | 0.585 | 0.584 | 0.584 | 0.590 | 0.865 |
| 6   | 0.704                       | 0.704 | 0.689 | 0.696 | 0.704 | 0.723 | 0.704 | 0.705 | 0.703 | 0.704 | 0.703 | 0.694 | 0.704 | 0.705 | 0.704 | 0.702 | 0.995 |
| 7   | 0.731                       | 0.730 | 0.704 | 0.710 | 0.730 | 0.743 | 0.729 | 0.731 | 0.728 | 0.730 | 0.729 | 0.735 | 0.730 | 0.730 | 0.731 | 0.728 | 1.249 |
| 8   | 0.865                       | 0.866 | 0.866 | 0.853 | 0.864 | 0.878 | 0.864 | 0.864 | 0.863 | 0.864 | 0.864 | 0.864 | 0.864 | 0.863 | 0.864 | 0.864 | 0.526 |
| 9   | 0.884                       | 0.885 | 0.885 | 0.871 | 0.881 | 0.909 | 0.881 | 0.881 | 0.880 | 0.882 | 0.882 | 0.883 | 0.882 | 0.882 | 0.882 | 0.880 | 0.856 |
| 10  | 0.915                       | 0.913 | 0.901 | 0.889 | 0.913 | 0.931 | 0.913 | 0.914 | 0.913 | 0.913 | 0.913 | 0.913 | 0.913 | 0.913 | 0.913 | 0.913 | 0.915 |
| 11  | 0.937                       | 0.931 | 0.914 | 0.917 | 0.932 | 0.951 | 0.932 | 0.932 | 0.931 | 0.935 | 0.935 | 0.939 | 0.934 | 0.929 | 0.935 | 0.931 | 0.875 |
| 12  | 0.958                       | 0.953 | 0.942 | 0.936 | 0.954 | 0.973 | 0.955 | 0.955 | 0.955 | 0.955 | 0.956 | 0.957 | 0.955 | 0.954 | 0.956 | 0.954 | 0.788 |
| 13  | 1.000                       | 1.000 | 1.000 | 1.000 | 1.000 | 1.000 | 1.000 | 1.000 | 1.000 | 1.000 | 1.000 | 1.000 | 1.000 | 1.000 | 1.000 | 1.000 | 0.000 |
| 14  | 1.071                       | 1.066 | 1.060 | 1.052 | 1.077 | 1.077 | 1.077 | 1.077 | 1.077 | 1.072 | 1.071 | 1.067 | 1.073 | 1.070 | 1.072 | 1.078 | 0.659 |
| 15  | 1.120                       | 1.117 | 1.120 | 1.118 | 1.126 | 1.134 | 1.125 | 1.126 | 1.127 | 1.122 | 1.121 | 1.115 | 1.124 | 1.123 | 1.123 | 1.127 | 0.422 |
| 16  | 1.219                       | 1.218 | 1.208 | 1.214 | 1.225 | 1.240 | 1.224 | 1.224 | 1.226 | 1.222 | 1.219 | 1.216 | 1.223 | 1.222 | 1.220 | 1.225 | 0.559 |
| 17  | 1.318                       | 1.320 | 1.306 | 1.310 | 1.325 | 1.345 | 1.322 | 1.324 | 1.326 | 1.321 | 1.318 | 1.315 | 1.323 | 1.321 | 1.319 | 1.325 | 0.632 |
| 18  | 1.419                       | 1.427 | 1.406 | 1.410 | 1.428 | 1.449 | 1.425 | 1.421 | 1.429 | 1.422 | 1.419 | 1.416 | 1.424 | 1.422 | 1.421 | 1.429 | 0.658 |

**Table S2.** The similarity results of the common peaks of the 16 batches of *S. baicalensis* with different processing.

| NO. | S1    | S2    | S3    | S4    | S5    | S6    | S7    | S8    | S9    | S10   | S11   | S12   | S13   | S14   | S15   | S16   | Sr.   |
|-----|-------|-------|-------|-------|-------|-------|-------|-------|-------|-------|-------|-------|-------|-------|-------|-------|-------|
| S1  | 1.000 | 0.997 | 0.994 | 0.998 | 0.996 | 0.998 | 0.996 | 0.997 | 0.997 | 1.000 | 0.998 | 0.998 | 0.999 | 0.990 | 0.992 | 0.999 | 0.998 |
| S2  | 0.997 | 1.000 | 0.999 | 1.000 | 1.000 | 1.000 | 1.000 | 1.000 | 1.000 | 0.998 | 0.999 | 0.999 | 0.998 | 0.997 | 0.998 | 0.998 | 1.000 |
| S3  | 0.994 | 0.999 | 1.000 | 0.999 | 1.000 | 0.999 | 1.000 | 0.999 | 0.999 | 0.995 | 0.998 | 0.999 | 0.996 | 0.999 | 0.999 | 0.996 | 0.999 |
| S4  | 0.998 | 1.000 | 0.999 | 1.000 | 1.000 | 1.000 | 1.000 | 1.000 | 1.000 | 0.998 | 0.999 | 0.999 | 0.999 | 0.997 | 0.998 | 0.998 | 1.000 |
| S5  | 0.996 | 1.000 | 1.000 | 1.000 | 1.000 | 1.000 | 1.000 | 1.000 | 1.000 | 0.997 | 0.999 | 0.999 | 0.998 | 0.998 | 0.999 | 0.998 | 1.000 |
| S6  | 0.998 | 1.000 | 0.999 | 1.000 | 1.000 | 1.000 | 0.999 | 1.000 | 1.000 | 0.999 | 0.999 | 1.000 | 0.999 | 0.996 | 0.997 | 0.999 | 1.000 |
| S7  | 0.996 | 1.000 | 1.000 | 1.000 | 1.000 | 0.999 | 1.000 | 0.999 | 0.999 | 0.997 | 0.998 | 0.998 | 0.997 | 0.998 | 0.999 | 0.997 | 0.999 |
| S8  | 0.997 | 1.000 | 0.999 | 1.000 | 1.000 | 1.000 | 0.999 | 1.000 | 1.000 | 0.998 | 1.000 | 1.000 | 0.999 | 0.997 | 0.998 | 0.998 | 1.000 |
| S9  | 0.997 | 1.000 | 0.999 | 1.000 | 1.000 | 1.000 | 0.999 | 1.000 | 1.000 | 0.998 | 0.999 | 0.999 | 0.999 | 0.997 | 0.998 | 0.998 | 1.000 |
| S10 | 1.000 | 0.998 | 0.995 | 0.998 | 0.997 | 0.999 | 0.997 | 0.998 | 0.998 | 1.000 | 0.998 | 0.999 | 1.000 | 0.991 | 0.993 | 1.000 | 0.998 |
| S11 | 0.998 | 0.999 | 0.998 | 0.999 | 0.999 | 0.999 | 0.998 | 1.000 | 0.999 | 0.998 | 1.000 | 1.000 | 0.999 | 0.996 | 0.997 | 0.999 | 0.999 |
| S12 | 0.998 | 0.999 | 0.999 | 0.999 | 0.999 | 1.000 | 0.998 | 1.000 | 0.999 | 0.999 | 1.000 | 1.000 | 0.999 | 0.996 | 0.997 | 0.999 | 1.000 |
| S13 | 0.999 | 0.998 | 0.996 | 0.999 | 0.998 | 0.999 | 0.997 | 0.999 | 0.999 | 1.000 | 0.999 | 0.999 | 1.000 | 0.993 | 0.994 | 1.000 | 0.999 |
| S14 | 0.990 | 0.997 | 0.999 | 0.997 | 0.998 | 0.996 | 0.998 | 0.997 | 0.997 | 0.991 | 0.996 | 0.996 | 0.993 | 1.000 | 1.000 | 0.992 | 0.997 |
| S15 | 0.992 | 0.998 | 0.999 | 0.998 | 0.999 | 0.997 | 0.999 | 0.998 | 0.998 | 0.993 | 0.997 | 0.997 | 0.994 | 1.000 | 1.000 | 0.994 | 0.998 |
| S16 | 0.999 | 0.998 | 0.996 | 0.998 | 0.998 | 0.999 | 0.997 | 0.998 | 0.998 | 1.000 | 0.999 | 0.999 | 1.000 | 0.992 | 0.994 | 1.000 | 0.999 |
| Sr. | 0.998 | 1.000 | 0.999 | 1.000 | 1.000 | 1.000 | 0.999 | 1.000 | 1.000 | 0.998 | 0.999 | 1.000 | 0.999 | 0.997 | 0.998 | 0.999 | 1.000 |

**Table S3.** The relative peak area of the common peaks of the 16 batches of *S. baicalensis* with different processing.

| NO. | The Relative Peak Area |       |       |       |       |       |       |       |       |       |       |       |       |       |       |       | RSD/%  |
|-----|------------------------|-------|-------|-------|-------|-------|-------|-------|-------|-------|-------|-------|-------|-------|-------|-------|--------|
|     | S1                     | S2    | S3    | S4    | S5    | S6    | S7    | S8    | S9    | S10   | S11   | S12   | S13   | S14   | S15   | S16   |        |
| 1   | 0.009                  | 0.009 | 0.010 | 0.008 | 0.009 | 0.017 | 0.008 | 0.008 | 0.008 | 0.015 | 0.016 | 0.016 | 0.009 | 0.009 | 0.006 | 0.017 | 35.487 |
| 2   | 0.063                  | 0.060 | 0.065 | 0.065 | 0.068 | 0.068 | 0.053 | 0.063 | 0.067 | 0.065 | 0.047 | 0.055 | 0.075 | 0.049 | 0.045 | 0.042 | 16.242 |
| 3   | 0.098                  | 0.082 | 0.146 | 0.146 | 0.113 | 0.164 | 0.099 | 0.109 | 0.167 | 0.101 | 0.092 | 0.106 | 0.111 | 0.088 | 0.102 | 0.106 | 23.091 |
| 4   | 0.082                  | 0.083 | 0.098 | 0.102 | 0.103 | 0.103 | 0.097 | 0.110 | 0.111 | 0.101 | 0.072 | 0.080 | 0.102 | 0.104 | 0.093 | 0.097 | 11.813 |
| 5   | 0.029                  | 0.029 | 0.019 | 0.014 | 0.032 | 0.032 | 0.026 | 0.023 | 0.023 | 0.029 | 0.023 | 0.023 | 0.032 | 0.020 | 0.022 | 0.030 | 21.160 |
| 6   | 0.147                  | 0.082 | 0.149 | 0.014 | 0.082 | 0.082 | 0.098 | 0.132 | 0.110 | 0.074 | 0.118 | 0.023 | 0.100 | 0.092 | 0.137 | 0.084 | 40.491 |
| 7   | 3.993                  | 3.966 | 0.089 | 0.100 | 4.230 | 4.233 | 3.852 | 4.436 | 4.248 | 4.178 | 4.859 | 4.505 | 4.348 | 4.501 | 4.300 | 4.167 | 38.584 |
| 8   | 0.261                  | 0.249 | 0.249 | 0.241 | 0.272 | 0.088 | 0.268 | 0.312 | 0.310 | 0.303 | 0.283 | 0.232 | 0.294 | 0.248 | 0.285 | 0.249 | 20.195 |
| 9   | 0.082                  | 0.087 | 0.247 | 0.276 | 0.093 | 0.077 | 0.062 | 0.089 | 0.080 | 0.089 | 0.124 | 0.085 | 0.076 | 0.080 | 0.097 | 0.057 | 58.953 |
| 10  | 0.070                  | 0.074 | 0.086 | 0.093 | 0.067 | 0.056 | 0.061 | 0.079 | 0.090 | 0.065 | 0.072 | 0.077 | 0.068 | 0.091 | 0.080 | 0.061 | 15.424 |
| 11  | 0.054                  | 0.058 | 0.058 | 0.068 | 0.062 | 0.255 | 0.081 | 0.052 | 0.058 | 0.032 | 0.054 | 0.045 | 0.057 | 0.048 | 0.058 | 0.072 | 73.144 |
| 12  | 0.216                  | 0.255 | 0.072 | 0.046 | 0.286 | 0.286 | 0.217 | 0.270 | 0.275 | 0.237 | 0.306 | 0.293 | 0.249 | 0.337 | 0.306 | 0.255 | 32.540 |
| 13  | 1.000                  | 1.000 | 1.000 | 1.000 | 1.000 | 1.000 | 1.000 | 1.000 | 1.000 | 1.000 | 1.000 | 1.000 | 1.000 | 1.000 | 1.000 | 1.000 | 0.000  |
| 14  | 0.035                  | 0.029 | 0.029 | 0.018 | 0.027 | 0.039 | 0.032 | 0.030 | 0.034 | 0.033 | 0.036 | 0.050 | 0.034 | 0.025 | 0.035 | 0.034 | 21.316 |
| 15  | 0.042                  | 0.032 | 0.032 | 0.030 | 0.041 | 0.035 | 0.022 | 0.030 | 0.030 | 0.059 | 0.054 | 0.021 | 0.045 | 0.018 | 0.032 | 0.039 | 32.273 |
| 16  | 0.623                  | 0.337 | 0.214 | 0.351 | 0.305 | 0.430 | 0.249 | 0.392 | 0.356 | 0.599 | 0.487 | 0.445 | 0.577 | 0.058 | 0.104 | 0.561 | 44.518 |
| 17  | 0.022                  | 0.017 | 0.026 | 0.018 | 0.026 | 0.032 | 0.024 | 0.024 | 0.028 | 0.027 | 0.027 | 0.019 | 0.042 | 0.028 | 0.025 | 0.032 | 23.584 |

**Table S4.** Principal components initial eigenvalue and contribution rate

| Principal Components | Eigenvalues | Contribution Rate (%) | Cumulative Contribution Rate(%) |
|----------------------|-------------|-----------------------|---------------------------------|
| 1                    | 4.563       | 32.59                 | 32.59                           |
| 2                    | 3.242       | 23.16                 | 55.75                           |
| 3                    | 2.304       | 16.455                | 72.205                          |
| 4                    | 1.476       | 10.541                | 82.747                          |

**Table S5.** Factor loading matrix after rotation.

| Peak no. | Principal Components |        |        |        |
|----------|----------------------|--------|--------|--------|
|          | 1                    | 2      | 3      | 4      |
| A3       | 0.625                | 0.03   | 0.655  | 0.137  |
| A4       | 0.764                | 0.343  | 0.218  | 0.415  |
| A7       | -0.417               | 0.846  | -0.24  | 0.129  |
| A8       | 0.367                | 0.018  | -0.694 | 0.518  |
| A9       | 0.646                | -0.718 | 0.155  | -0.125 |
| A10      | 0.889                | -0.037 | -0.263 | 0.009  |
| A11      | 0.068                | 0.36   | 0.87   | -0.183 |
| A12      | -0.212               | 0.906  | -0.245 | 0.009  |
| A13      | 0.807                | 0.344  | 0.068  | 0.119  |
| A14      | -0.327               | 0.563  | 0.216  | -0.355 |
| A15      | -0.483               | -0.332 | 0.158  | 0.591  |
| A16      | -0.653               | -0.3   | 0.32   | 0.325  |
| A17      | 0.018                | 0.428  | 0.427  | 0.55   |
| A18      | -0.778               | -0.349 | 0.135  | 0.227  |

### 1. Validation of methodology

According to the Pharmacopeia guidelines of the People's Republic of methodology was performed with linear regression analysis and tests of precision, repeatability, stability, and recovery rate.

#### 1.1. Linear relationships

Each standard curve was obtained by plotting the PA (y) against the mixed standard solution concentrations (x,  $\mu\text{g}\cdot\text{mL}^{-1}$ ). The results are shown in Table S6. The four ingredients each had an excellent linear relationship within their respective detection ranges and the linear coefficient of determination ( $r^2$ ) exceeded 0.999.

#### 1.2. Precision, repeatability, stability, and recovery tests

Method precision and repeatability were evaluated via successive analyses of four replicates of the same powder sample. The relative standard deviation (R.S.D.) was 0.06-1.50% for retention time (tR) and 0.41-2.17% for the PA of four characteristic peaks.

These findings showed that the method had good repeatability and precision. The stability of the sample solutions was determined by analyzing samples at 0, 2, 4, 8, 16, and 24 h after solution preparation. The R.S.D. was 0.23-1.30% for tR and 0.73-2.33% for the PA of the characteristic peaks. These results showed that the sample solution had good stability within 24 h. The recovery rate was determined by the standard addition method. The recovery of the four standards ranged from 96.92% to 104.83%. The R.S.D. was 0.96-3.52% for PA. The results of the precision, repeatability, stability and recovery tests are shown in Table S7 and Table S8.

**Table S6.** Linear relationships table of four active ingredients.

| Components | Regression Equation                  | R <sup>2</sup> | Linear Range (ug·mL <sup>-1</sup> ) |
|------------|--------------------------------------|----------------|-------------------------------------|
| Baicalin   | y = 62,856,944.1952 x - 392,012.1028 | 0.9998         | 6.58~657.50                         |
| Wogonoside | y = 72,138,920.7031 x - 19,176.7275  | 0.9997         | 1.00~100.00                         |
| Baicalein  | y = 43,555,907.2718 x - 82,035.0058  | 0.9997         | 28.72~2871.80                       |
| Wogonin    | y = 52,715,929.0570 x - 467,342.8039 | 0.9996         | 10.00~1000.00                       |

**Table S7.** Analytical results of precision, and stability of four ingredients.

| Components | Precision (n=6)    |                    | Stability (n=6)    |                    |
|------------|--------------------|--------------------|--------------------|--------------------|
|            | RSD of relative    | RSD of relative    | RSD of relative    | RSD of relative    |
|            | Retention time (%) | Retention Area (%) | Retention time (%) | Retention Area (%) |
| Baicalin   | 1.50               | 1.50               | 1.28               | 2.24               |
| Wogonoside | 0.40               | 0.53               | 1.30               | 0.73               |
| Baicalein  | 0.12               | 0.41               | 0.76               | 0.89               |
| Wogonin    | 0.06               | 1.72               | 0.23               | 2.33               |

**Table S8.** Analytical results of repeatability and recovery tests of four ingredients

| Components | Repeatability (n = 6) |                    | Recovery rate (n = 6) |                  |
|------------|-----------------------|--------------------|-----------------------|------------------|
|            | RSD of Relative       | RSD of Relative    | Recovery Rate (%)     | RSD of Retention |
|            | Retention Time (%)    | Retention Area (%) |                       | Area (%)         |
| Baicalin   | 0.68                  | 2.17               | 104.83                | 2.34             |
| Wogonoside | 0.90                  | 1.99               | 102.66                | 0.96             |
| Baicalein  | 0.27                  | 1.54               | 96.92                 | 3.52             |
| Wogonin    | 0.19                  | 1.72               | 100.38                | 1.71             |
